# Supplementary material for: Histone modifications regulate pioneer transcription factor cooperativity
Source: PubMed Central journal article supplement (PMC10338341; doi:10.1038/s41586-023-06112-6), 2023-05-24
Supplement: 41586_2023_6112_MOESM1_ESM.pdf [file 41586_2023_6112_MOESM1_ESM.pdf]

**Supplementary information**

---

**Histone modifications regulate pioneer transcription factor cooperativity**

---

In the format provided by the authors and unedited

# Supplementary Information

# Supplementary Figure 1

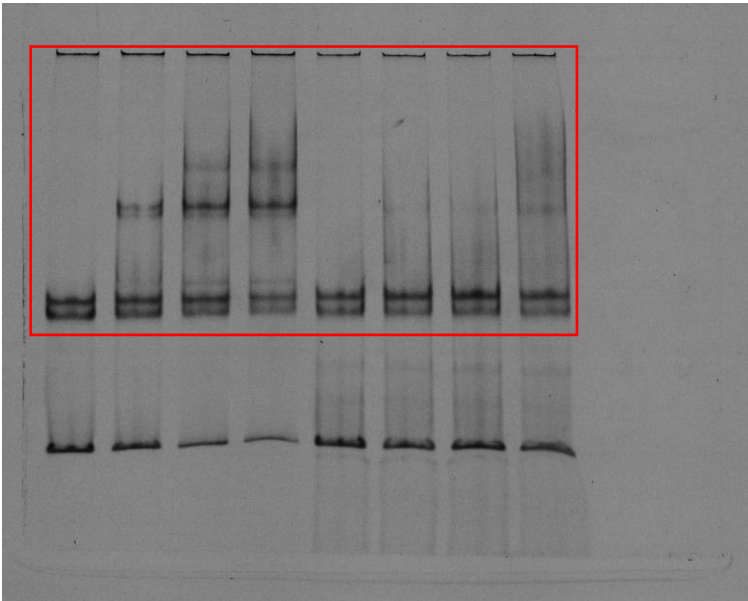

Figure 3b

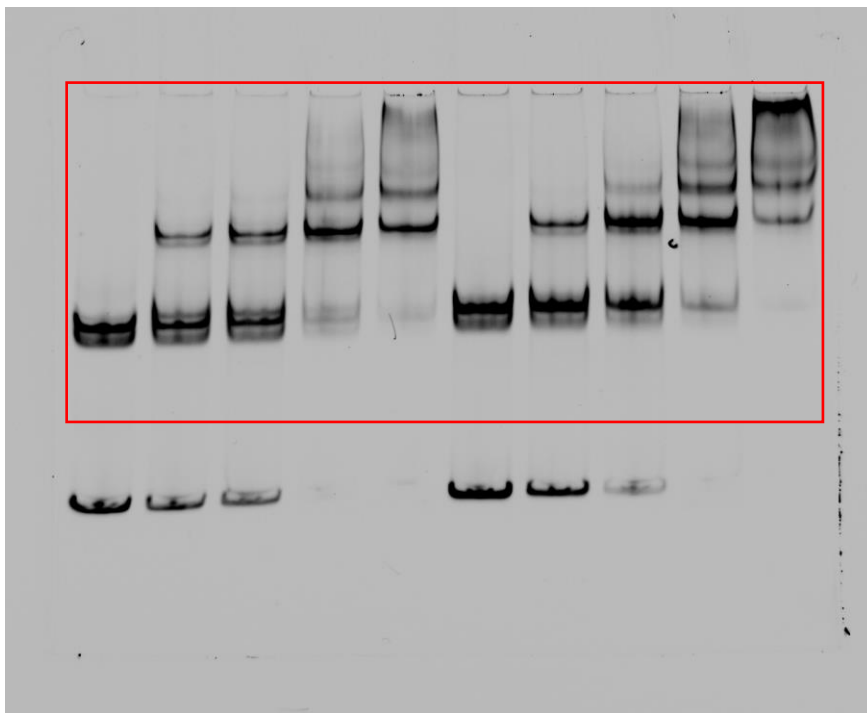

Figure 3e

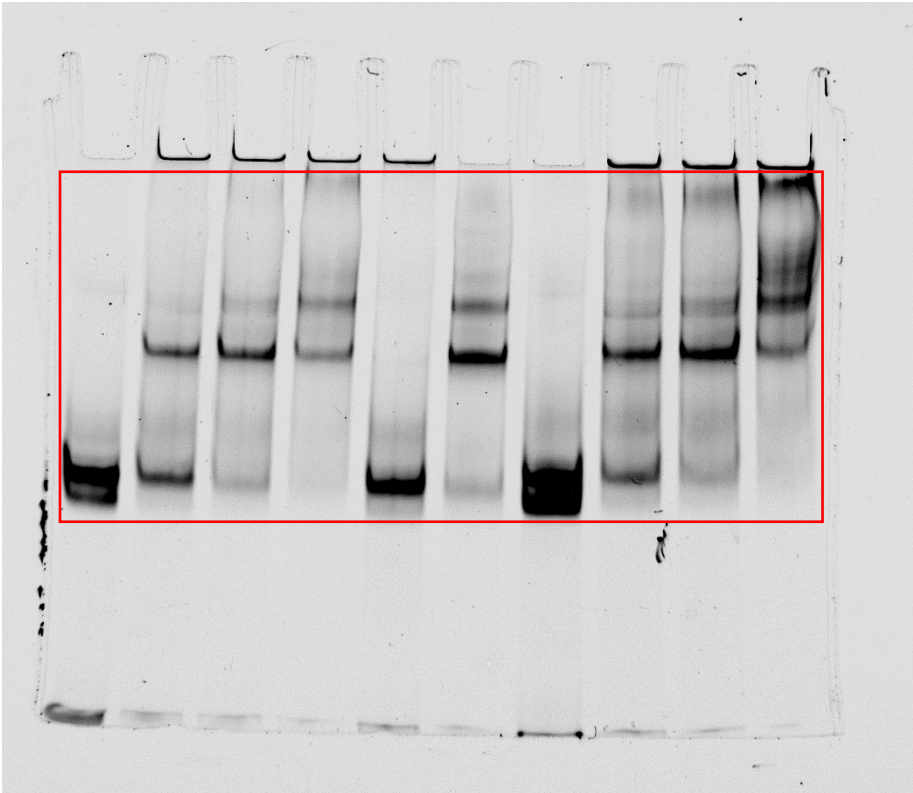

Figure 4a

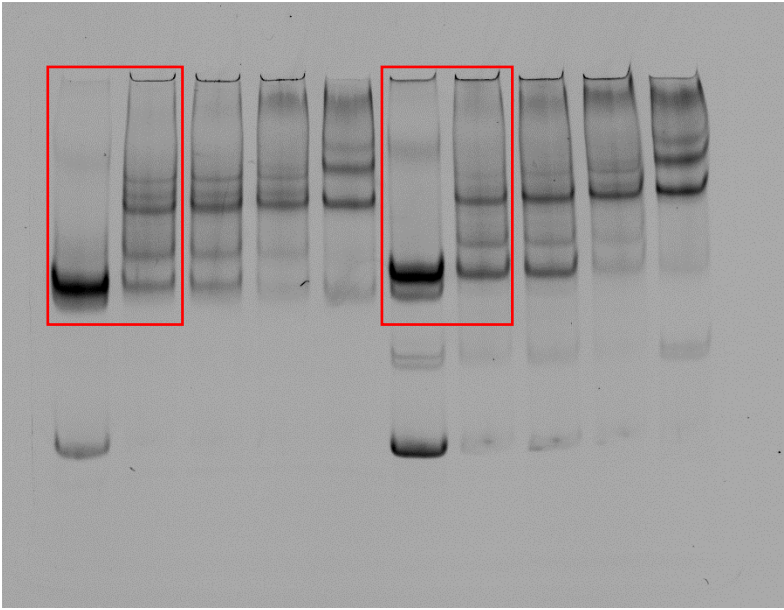

Figure 4b

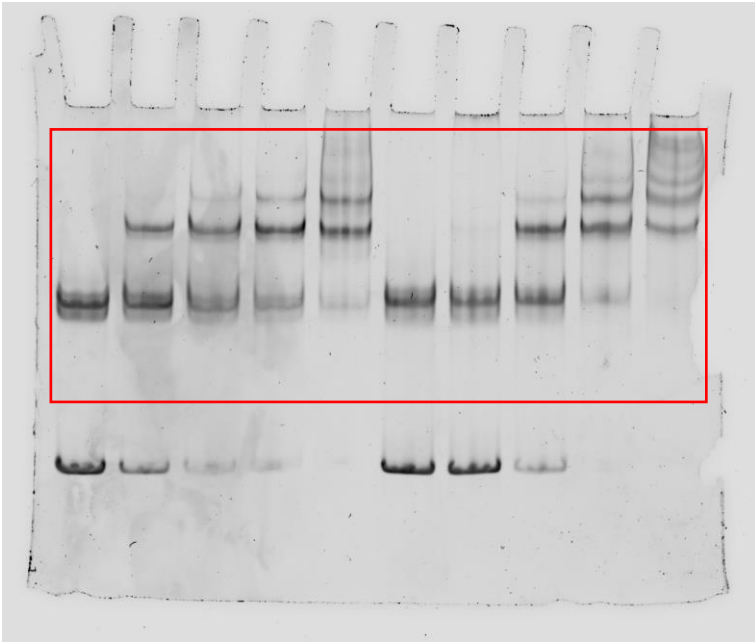

Figure 5c

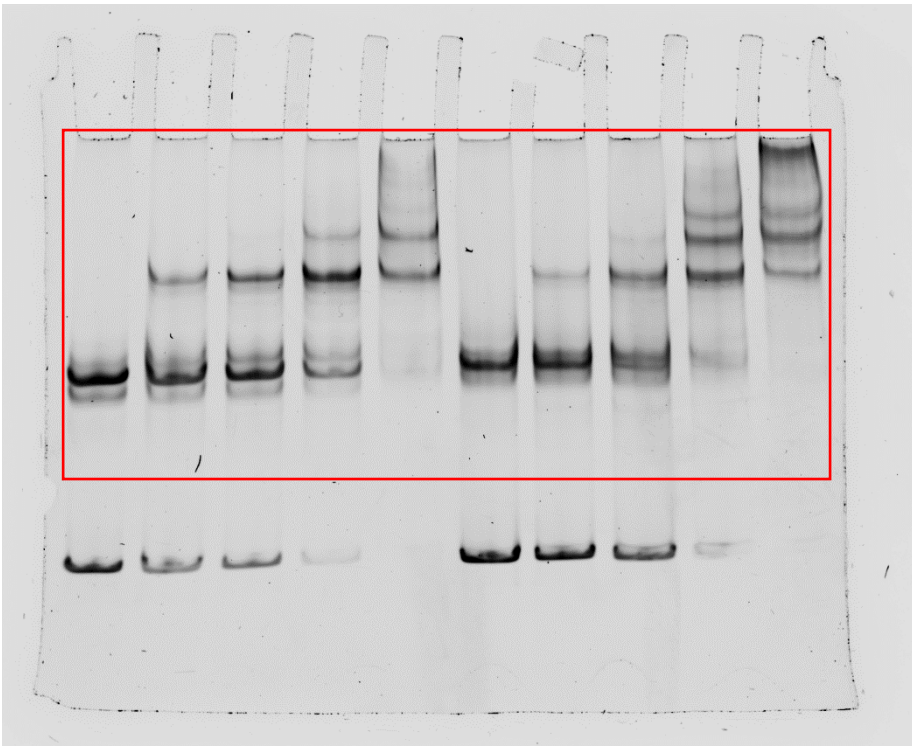

Figure 5d

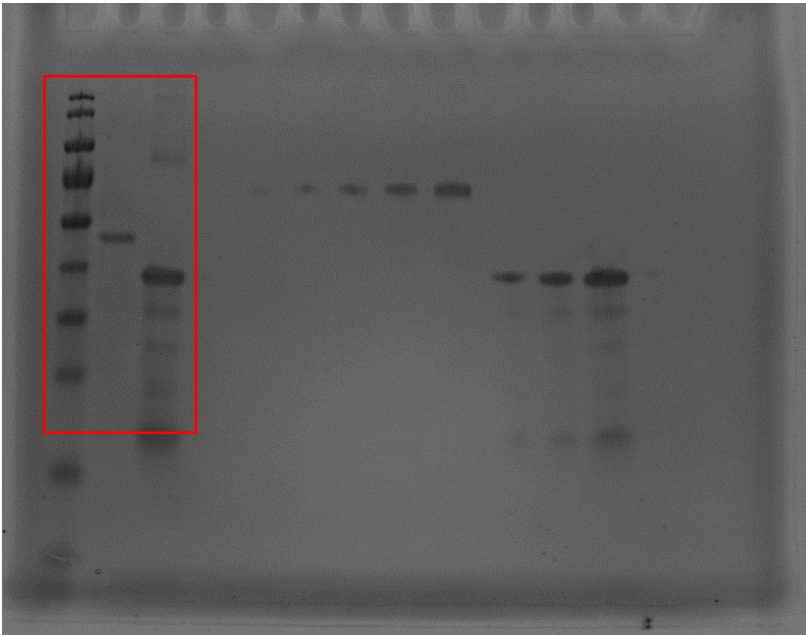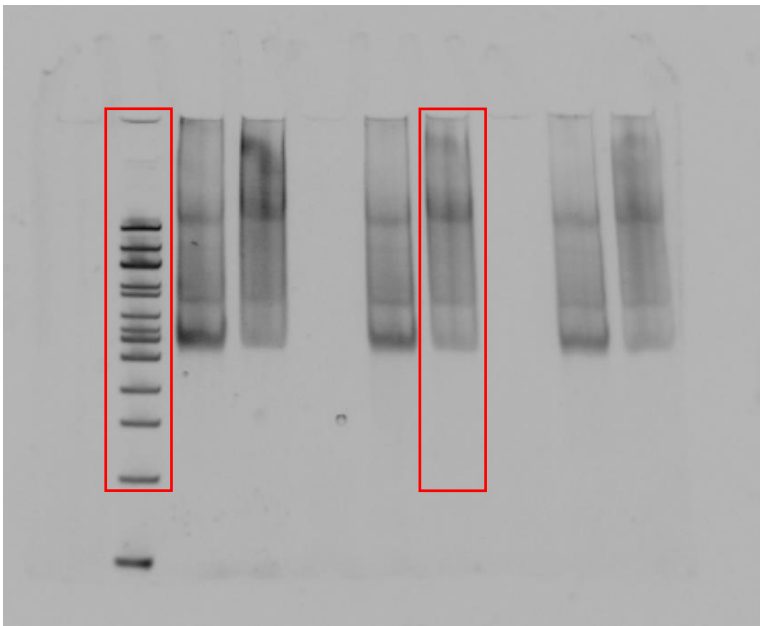

Extended Data 1a

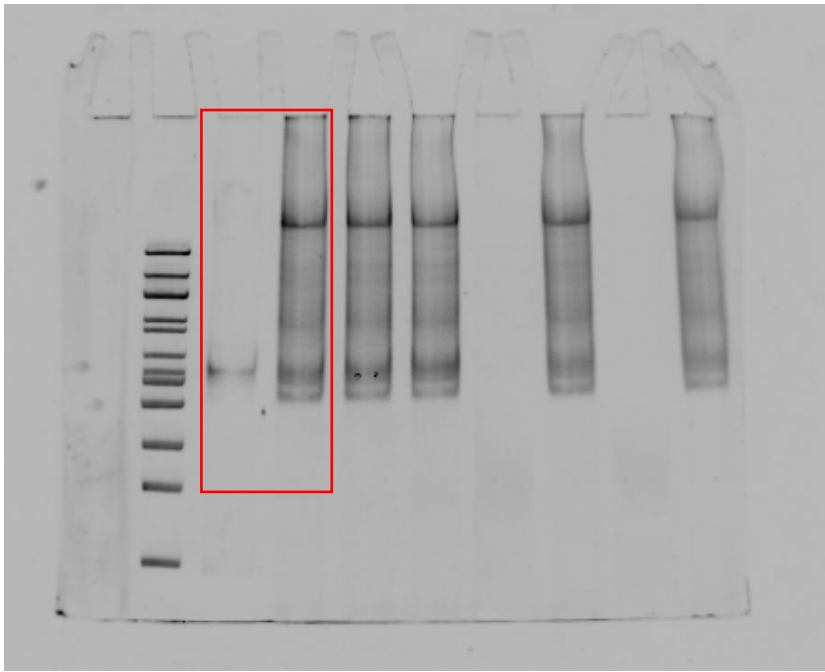

DNA

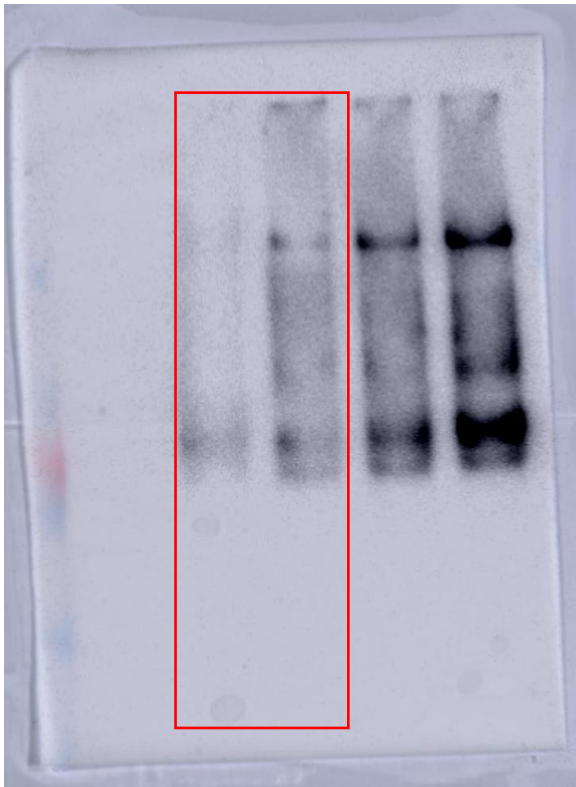

Anti-H3

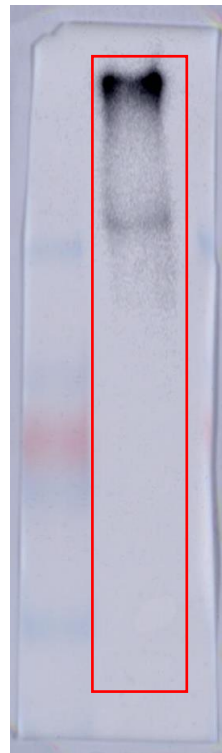

anti-Oct4

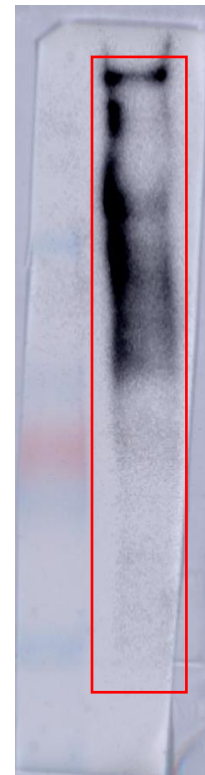

anti-Sox2

Extended Data 1a

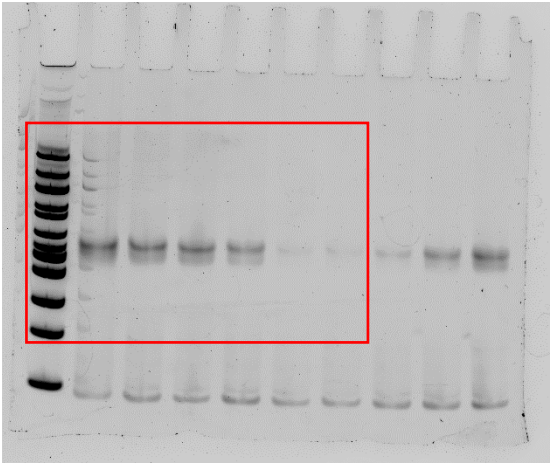

nucleosome

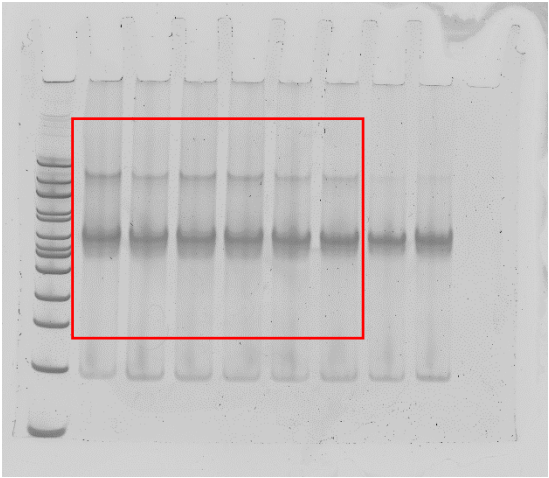

Oct4

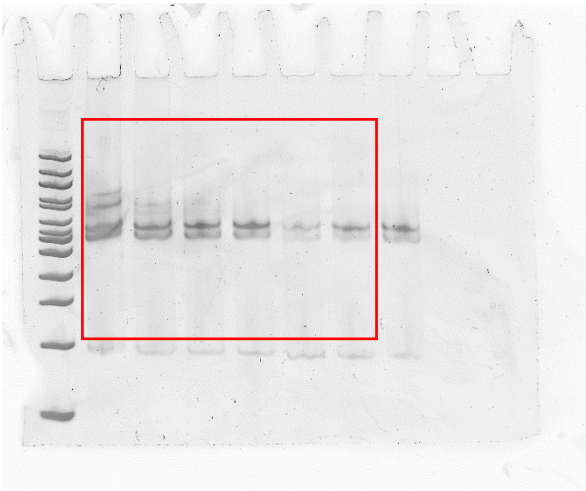

Oct4ΔNtail

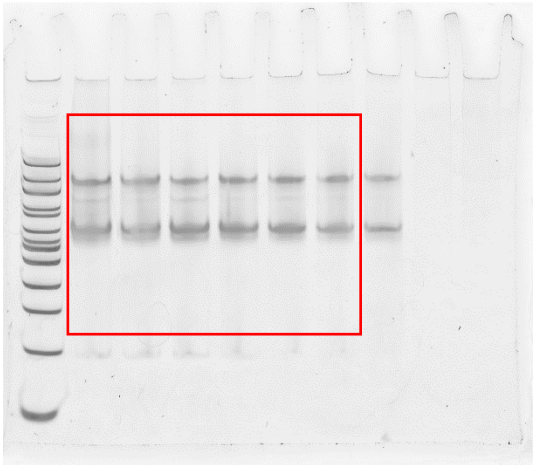

Oct4ΔCtail

Extended Data 5a



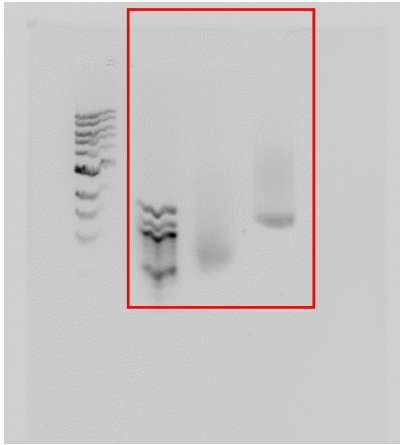

Extended Data 5b

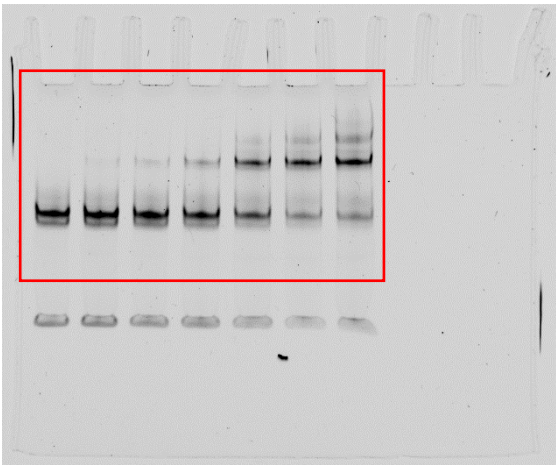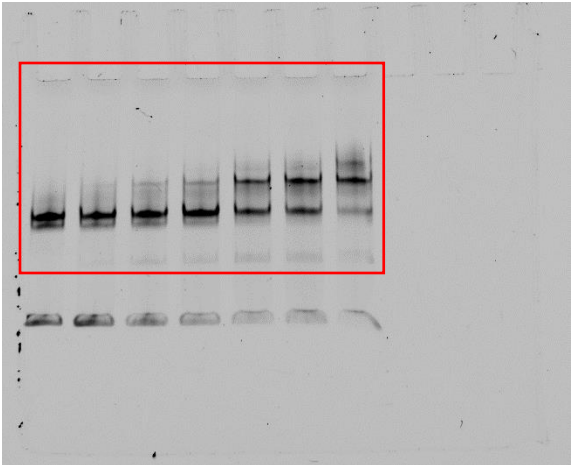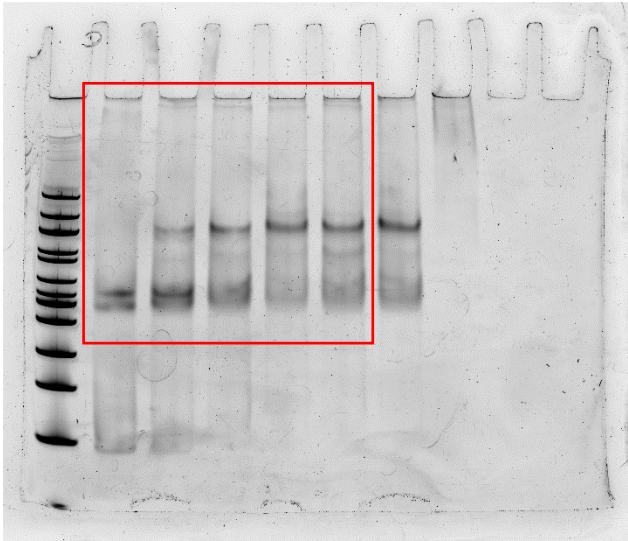

Extended Data 5d

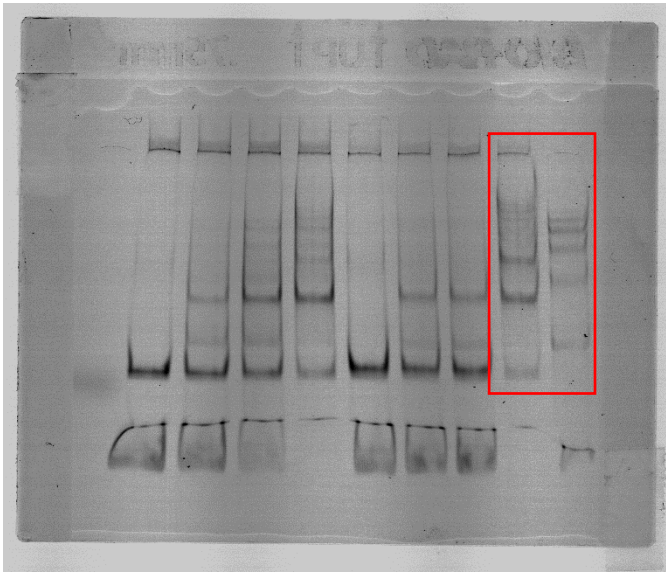

Extended Data 5f

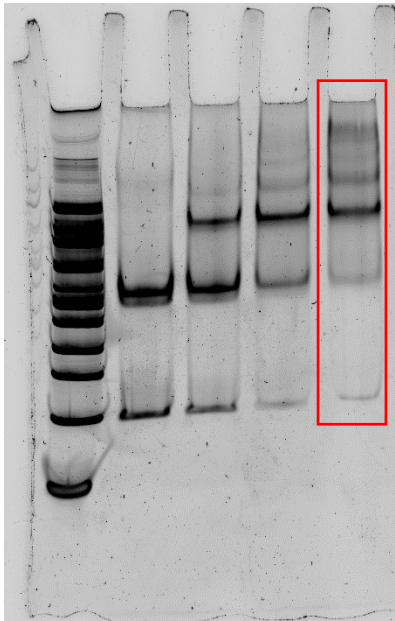

DNA

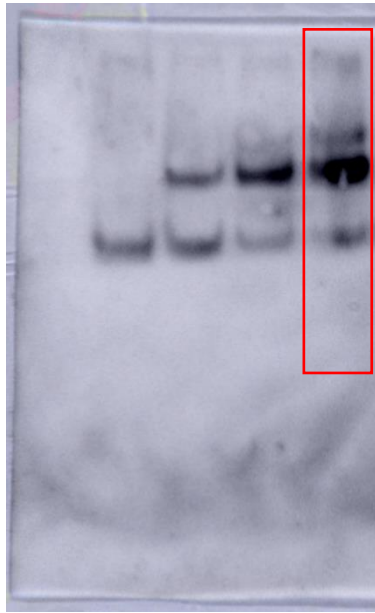

Anti-H3

Extended Data 5g

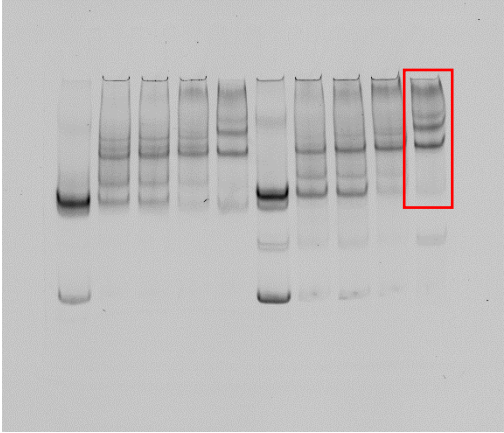

DNA

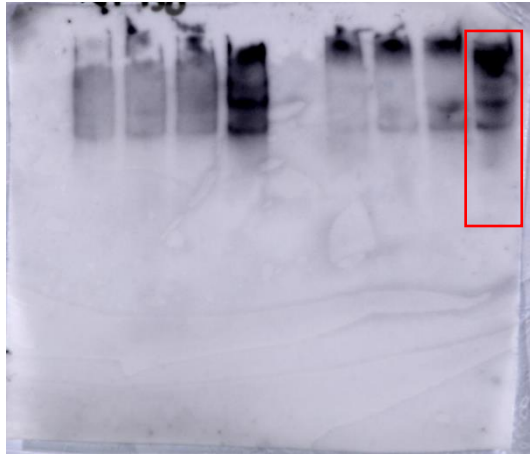

anti-Oct4

Extended Data 5g

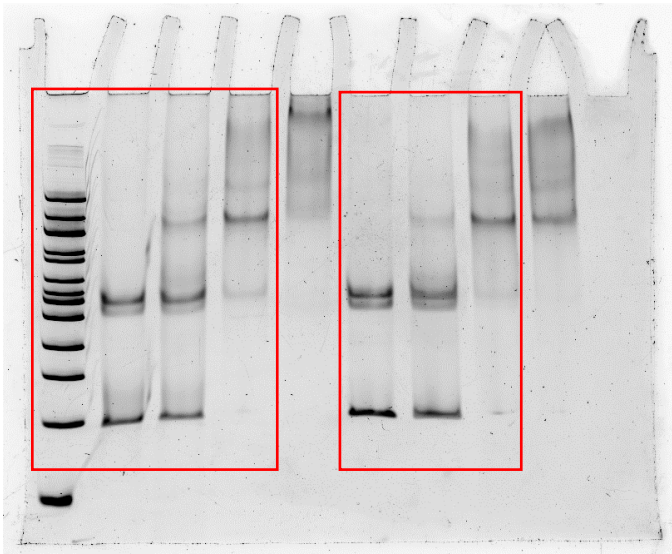

LIN28B

LIN28B\_2M

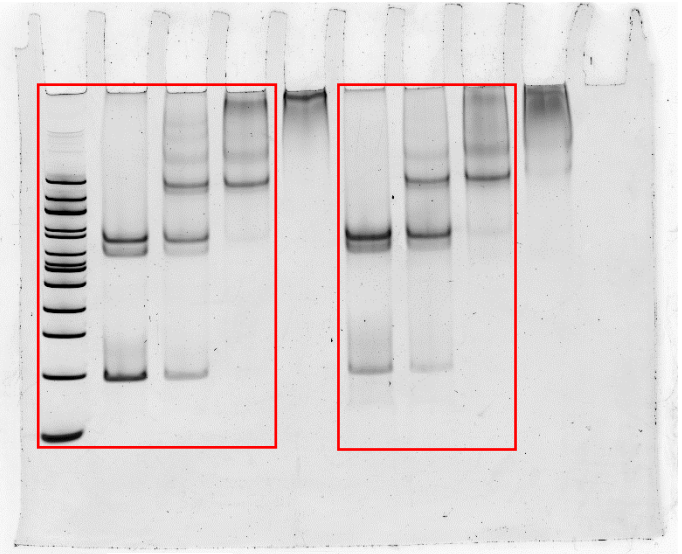

LIN28B

LIN28B\_3M

Extended Data 5h

Extended Data 5i

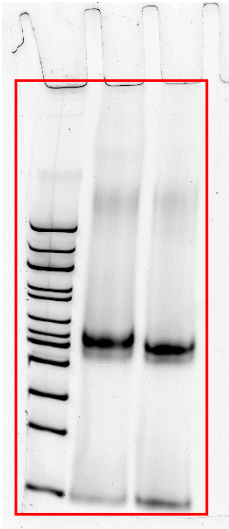

Extended Data 6a

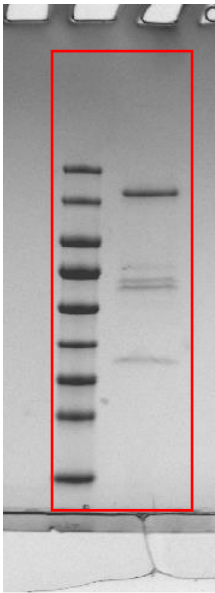

MIDAC

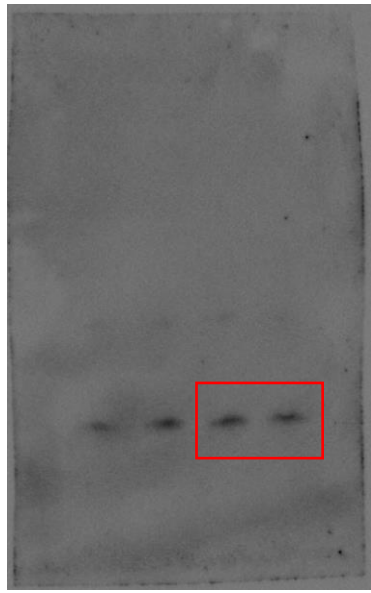

anti-H3

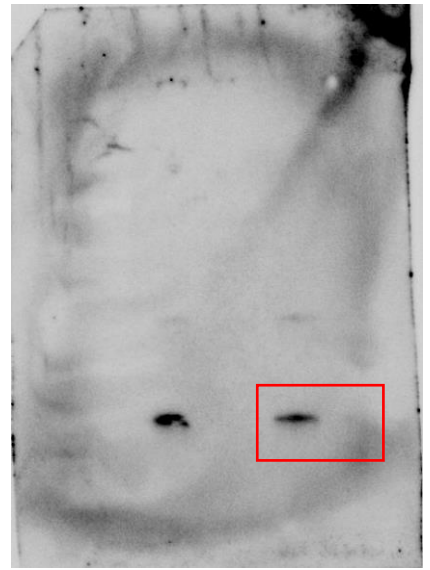

anti-H3K27ac

Extended Data 6b

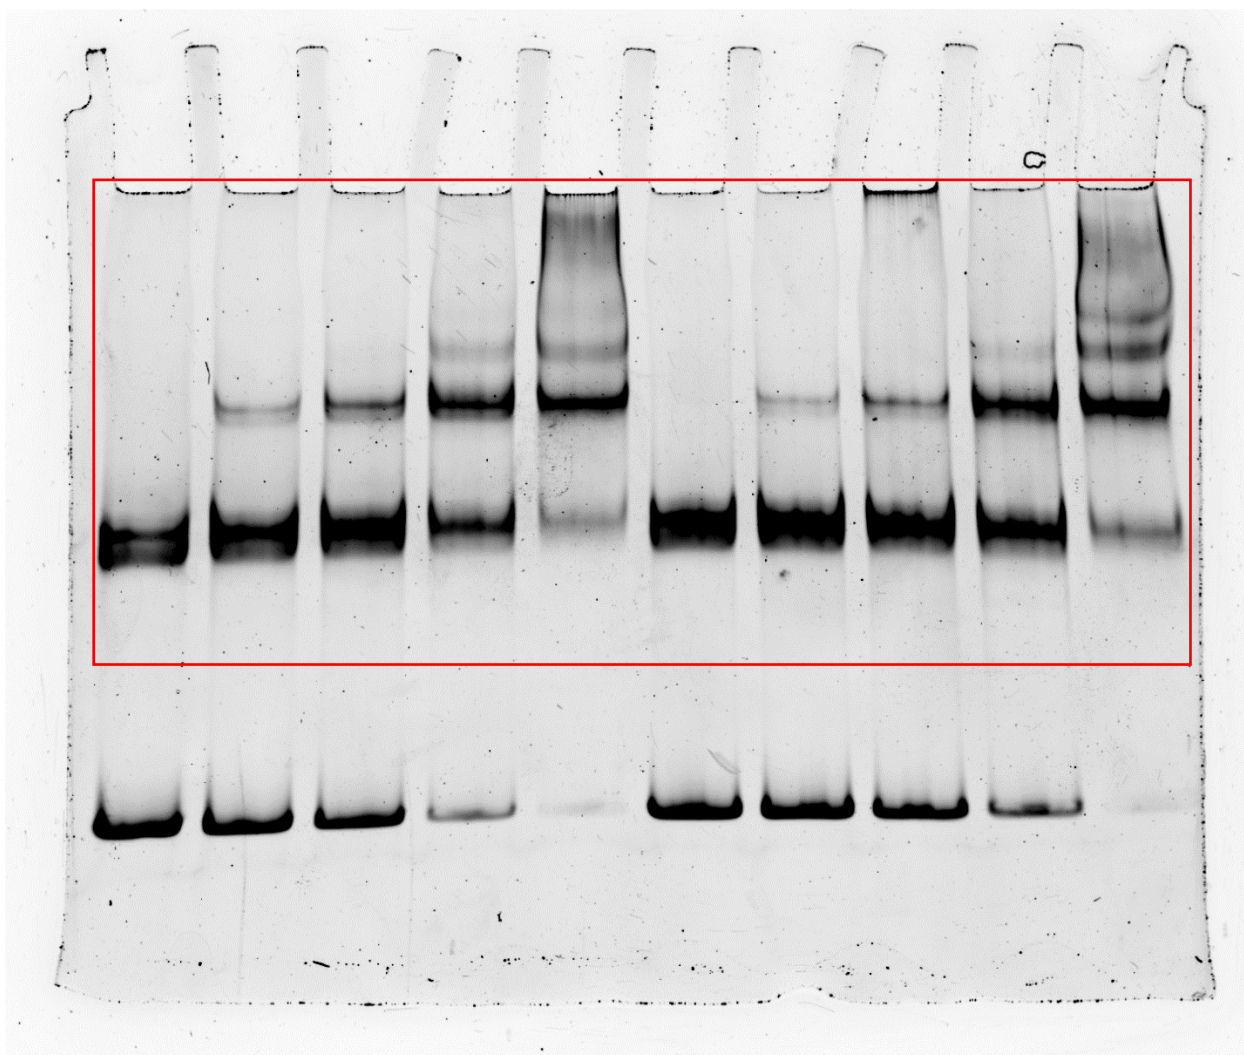

Extended Data 6c

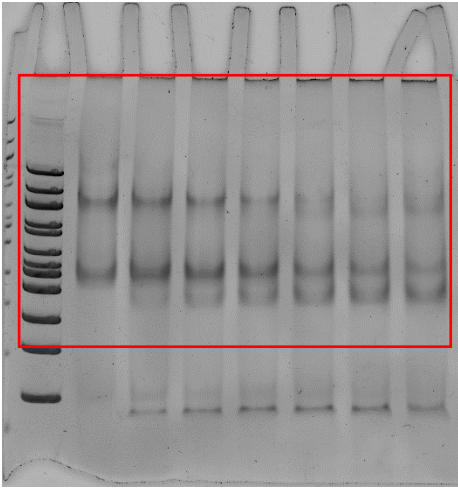

Oct4\_Lin28B

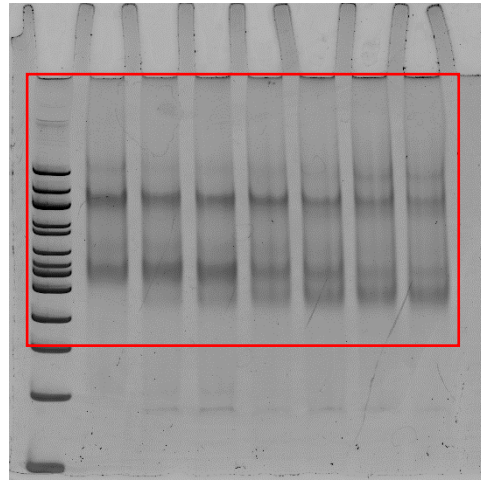

Oct4\_Lin28B-H3K27ac

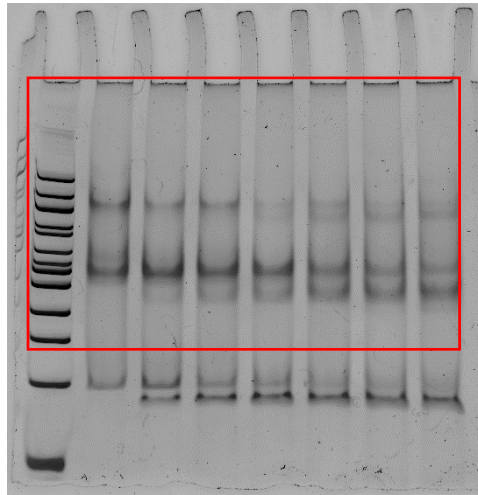

Oct4\_Lin28B-H3Kme3

Extended Data 6d

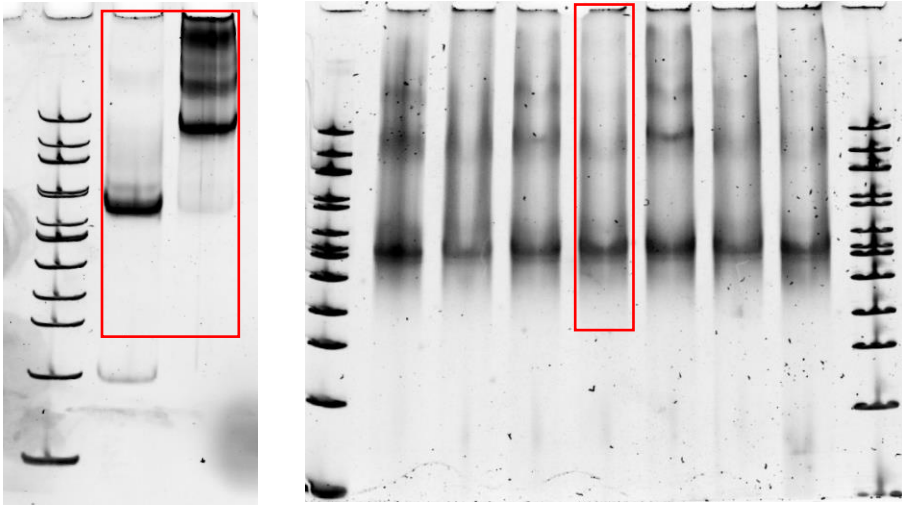

LIN28B

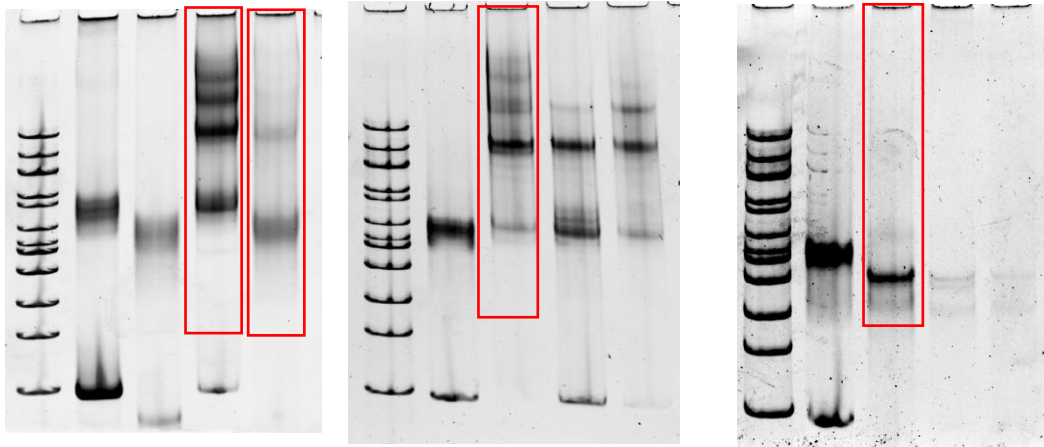

LIN28B H3K27ac

LIN28B H3K27me3

Extended Data 6d

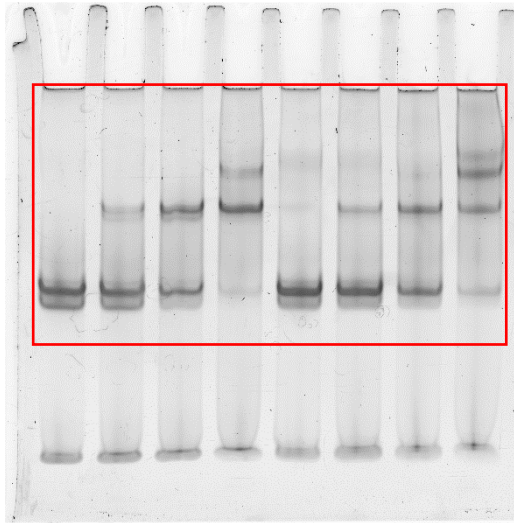

LIN28B

LIN28B\_OSO+1

Extended Data 6h

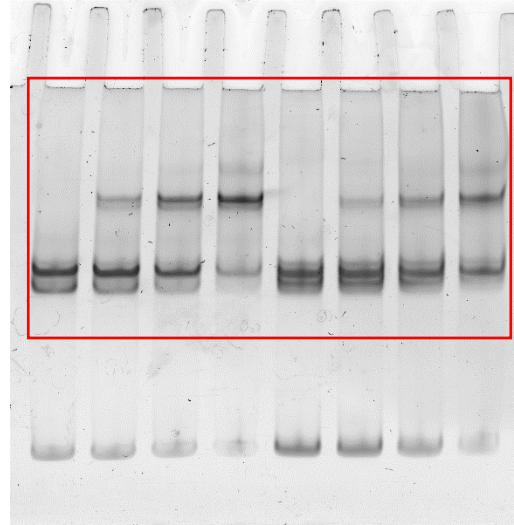

LIN28B

LIN28B\_OSO+2

Extended Data 6i

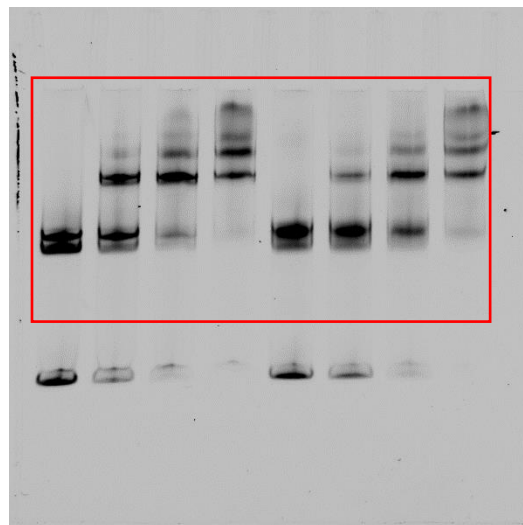

LIN28B

LIN28B\_H3K27ac OSO+1

Extended Data 6J



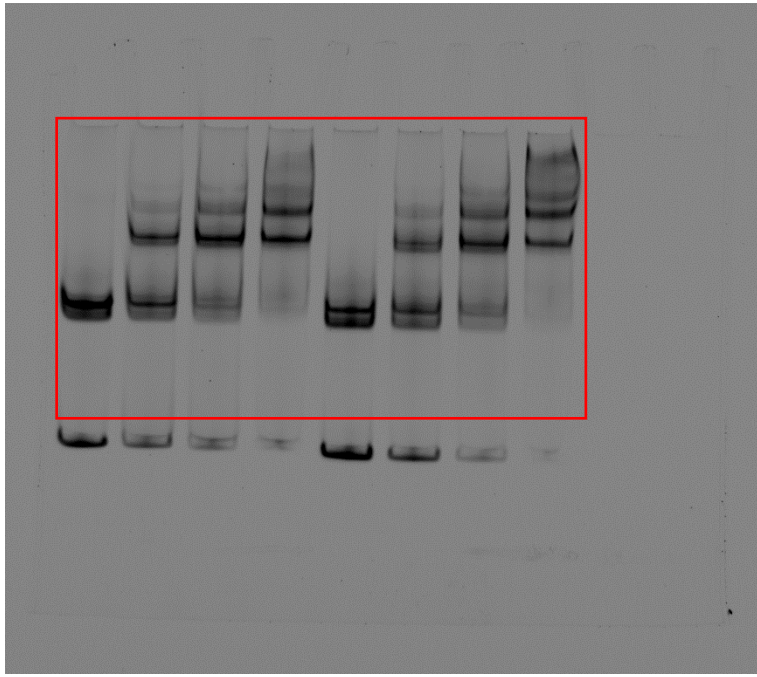

Extended Data 7a

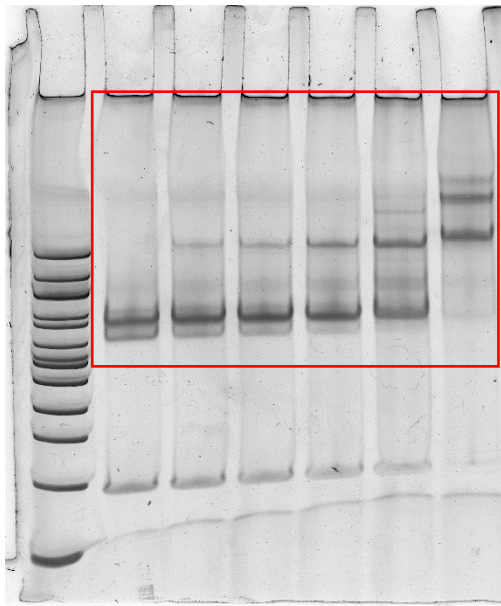

Extended Data 7e

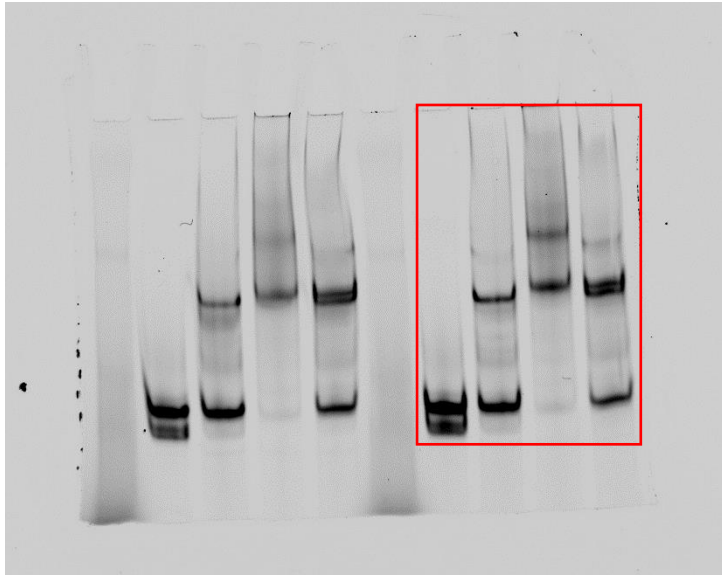

DNA

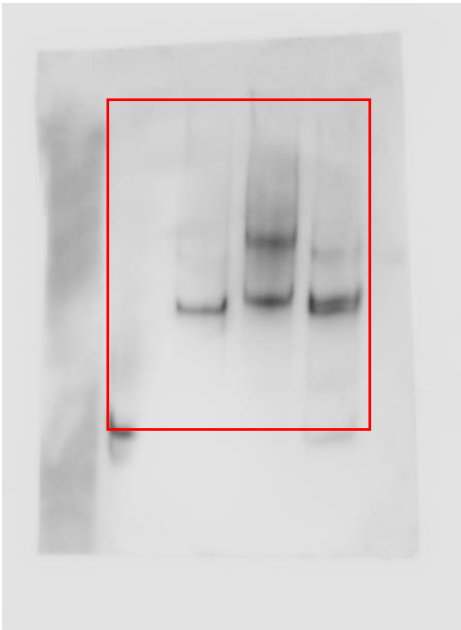

anti-H3

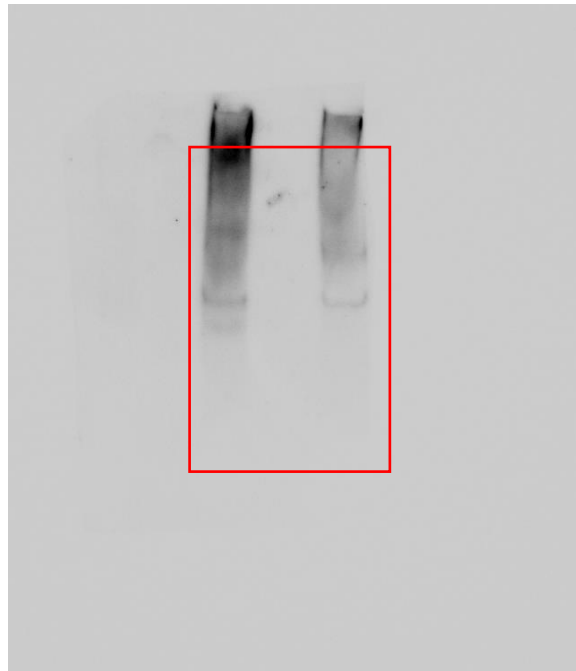

anti-Sox2

Extended Data 7f

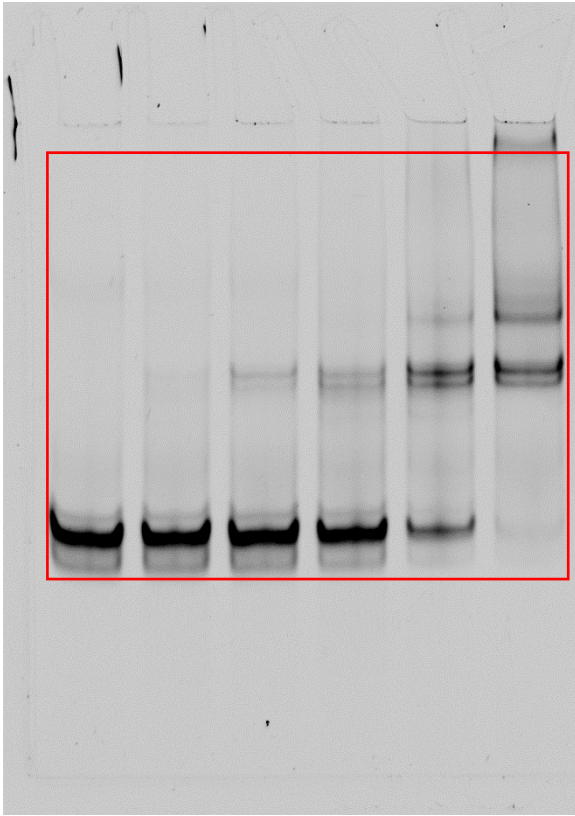

Extended Data 7g

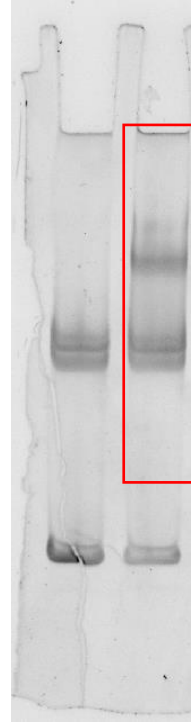

Extended Data 8a

**Supplementary Table 1: List of oligonucleotides used in the study**

| Oligonucleotides                            | Sequence                                                                                                                                                                                                                                                                                                                                                                                                                                                                                                                                                                                                            |
|---------------------------------------------|---------------------------------------------------------------------------------------------------------------------------------------------------------------------------------------------------------------------------------------------------------------------------------------------------------------------------------------------------------------------------------------------------------------------------------------------------------------------------------------------------------------------------------------------------------------------------------------------------------------------|
| <b>LIN28 amplification primers</b>          |                                                                                                                                                                                                                                                                                                                                                                                                                                                                                                                                                                                                                     |
| LIN28B 1010 Forward primer                  | GCATAAGTTAAGT GGT ATT AAC ATA TCC TCA GTG GTG                                                                                                                                                                                                                                                                                                                                                                                                                                                                                                                                                                       |
| LIN28B 1010 Reverse primer                  | ATGAAGTATGTGT CTT TAT TCA CAA GCT TGC ACA A                                                                                                                                                                                                                                                                                                                                                                                                                                                                                                                                                                         |
| LIN28B_1M Forward primer                    | GCATAAGTTAAGT GGT GCGTCG ATA TCC TCA GTG GTG                                                                                                                                                                                                                                                                                                                                                                                                                                                                                                                                                                        |
| LIN28B_1M Reverse primer                    | ATGAAGTATGTGT CTT TAT TCA CAA GCT TGC ACA A                                                                                                                                                                                                                                                                                                                                                                                                                                                                                                                                                                         |
| LIN28B 1010 Forward primer - Biotinylated   | /5Biosg/GATAT CAG TTG GAG CAT AAG TTA AGT GGT ATT AAC ATA                                                                                                                                                                                                                                                                                                                                                                                                                                                                                                                                                           |
| Forward primer for LIN28B genomic array DNA | TATTATGATATTTAATGCATCTGTG                                                                                                                                                                                                                                                                                                                                                                                                                                                                                                                                                                                           |
| Reverse primer for LIN28B genomic array DNA | GGCCAATTTAAAGAACTCAATAG                                                                                                                                                                                                                                                                                                                                                                                                                                                                                                                                                                                             |
| nMatn1_F                                    | ACATGCACACATGCTAATATATG                                                                                                                                                                                                                                                                                                                                                                                                                                                                                                                                                                                             |
| nMatn1_R                                    | TGCATGTATGTGTATGCATATGC                                                                                                                                                                                                                                                                                                                                                                                                                                                                                                                                                                                             |
| <b>Primers for Oct4 mutagenesis</b>         |                                                                                                                                                                                                                                                                                                                                                                                                                                                                                                                                                                                                                     |
| Oct4_delN_For                               | CAGGACATCAAAGCTCTG                                                                                                                                                                                                                                                                                                                                                                                                                                                                                                                                                                                                  |
| Oct4_delN_Rev                               | CATCGAATTCGGATCCCGAC                                                                                                                                                                                                                                                                                                                                                                                                                                                                                                                                                                                                |
| Oct4_delC_For                               | CCCATGCATTCAAAGTGA                                                                                                                                                                                                                                                                                                                                                                                                                                                                                                                                                                                                  |
| Oct4_delC_Rev                               | TGATCGCTTGCCCTTCTG                                                                                                                                                                                                                                                                                                                                                                                                                                                                                                                                                                                                  |
| <b>DNA sequences</b>                        |                                                                                                                                                                                                                                                                                                                                                                                                                                                                                                                                                                                                                     |
| Lin28B                                      | 5': <u>GCAT AAG TTA</u> AGT GGT ATT AAC ATA TCC TCA GTG GTG<br>AGT ATT AAC ATG GAA CTT ACT CCA ACA ATA CAG ATG CTG AAT<br>AAA TGT AGT CTA AGT GAA GAA AGA AGG AAA GGT GGG AGC<br>TGC CAT CAC TCA GAA TTG TCC AGC AGG GAT TGT GCA AGC<br>TTG TGA ATA AAG ACA <u>CAT ACT TCA T</u> ;3'                                                                                                                                                                                                                                                                                                                                |
| Lin28B locus                                | TATTATGATATTTAATGCATCTGTGGCTTAACACTTGTGAGAGTTAC<br>CAGCTTGAAAATGATGGTGTGACTACCTCTTGAATCACATCTATC<br>AACCCTGGCACCTACCACCAAGCTGGCTTCAATTAGTATGTGTT<br>GCTTTTTGGTATTAACAACCTAACCCTACTAGAGACCAAAGTGAAC<br>CCTGATTTTTATATGTCTTTAATAATGGTGTGTTTATCTAGTGTGTTTA<br>AATTATCCTGTGTAGTATTTAGATTACCTCATTGTCCATTTTGACTC<br>ATGTTGTTTACAAGTGAAAATAAAAAACACTTGAAGTGTATGTTTTTA<br>AAAGACAAAAAAGGGGTAGATGTTTGAATGCGTTTCACTCGCAT<br>GCAGTCATCTGGAGGGACTGAAGCACTGTTTGCCTTTCTGTACA<br>CTCTGGGTTTTATATTCTCATTTCATGCCTAATGTCTTATTCTGTCA<br>ATTATGGATATGTTGAGGTTTAAAAAATACTTGATTAATAAAAA<br>CATATAACGTTGGCATTATGATGGGTTTTGGAGATTTTTTATGATG |

|                   |                                                                                                                                                                                                                                                                                                                                                                                                                                                                                                                                                         |
|-------------------|---------------------------------------------------------------------------------------------------------------------------------------------------------------------------------------------------------------------------------------------------------------------------------------------------------------------------------------------------------------------------------------------------------------------------------------------------------------------------------------------------------------------------------------------------------|
|                   | <p>TGTGTTCTTACTAAGTTAAGTGAAAGGATAAAAGGCCATTTAGGCA<br/> GTGTTTTACATCAGTTGGAGCATAAGTTAAGTGGTATTAACATATC<br/> CTCAGTGGTGAGTATTAACATGGAACCTTACTCCAACAATACAGA<br/> TGCTGAATAAATGTAGTCTAAGTGAAGGAAGAAGGAAAGGTGG<br/> GAGCTGCCATCACTCAGAATTGTCCAGCAGGGATTGTGCAAGC<br/> TTGTGAATAAAGACACATACTTCATGTAGTCAGAAGAGTGGTCT<br/> GAAGCAAAATATTCAAAGCCTATTGAAGAAATCATTTTAGAATTTTT<br/> CTACAAGTTTTTTCTAATAAAGAATTTGAAAAGGGCAAATTTTATCA<br/> GTACCAAATATCTAAAATACGAATGTAGATTTATCAAACCATGAATG<br/> CAGTATTGATGTACTGTAACAAACGATTTGGTAAAACCTATTGAGTT<br/> CTTTAAATTGGCC</p> |
| OBS (+) 1 bp DNA: | <p>GCAT AAG TTA AGT GGT ATT AAC ATA TCC TCA GTG GTG AGT<br/> <u>A</u> ATT AAC ATG GAA CTT ACT CCA ACAATA CAG ATG CTG<br/> AATAA TGT AGT CTA AGT GAA GAA AGA AGG AAA GGT GGG<br/> AGC TGC CAT CAC TCAGAA TTG TCC AGC AGG GAT TGT GCA<br/> AGC TTG TGA ATA AAG ACA CAT ACT TCA T</p>                                                                                                                                                                                                                                                                      |
| OBS (+) 2 bp DNA: | <p>GCAT AAG TTA AGT GGT ATT AAC ATA TCC TCA GTG GTG AGT<br/> <u>AA</u> ATT AAC ATG GAA CTT ACT CCA ACAATA CAG ATG CTG<br/> AATA TGT AGT CTA AGT GAA GAA AGA AGG AAA GGT GGG<br/> AGC TGC CAT CAC TCAGAA TTG TCC AGC AGG GAT TGT GCA<br/> AGC TTG TGA ATA AAG ACA CAT ACT TCA T</p>                                                                                                                                                                                                                                                                      |
| SBS (-) 5 bp DNA  | <p>GCAT AAG TTA AGT GGT ATT AAC ATA TCC TCA GTG GTG AGT<br/> ATT AAC AT G GAA C TT AACAATA ACT CC CAG ATG CTG AA T<br/> AAA T GT AGT CTA AGT GAA GAA AGA AGG AAA GGT GGG AGC<br/> TGC CAT CAC TCAGAA TTG TCC AGC AGG GAT TGT GCA AGC<br/> TTG TGA ATA AAG ACA <u>CAT ACT TCA T</u></p>                                                                                                                                                                                                                                                                  |
| nMatn1            | <p>ACATGCACACATGCTAATATATGCACACAATGCACACAGGTTAATA<br/> TATACACATACACACACATGCACACACACGTGCACACATATATGCA<br/> CATGCATGCACACACGTATATGCACACACATGCACATGCATGCGC<br/> ACATAGTCACACACATGCACACATTAGCATATGCATACACATACAT<br/> GCA</p>                                                                                                                                                                                                                                                                                                                               |

**Supplementary Table 2: Plasmids used in this study**

|       |                                       |
|-------|---------------------------------------|
| SJ131 | pDeuet-LIN28B                         |
| SJ134 | pET28-Oct4 N-terminus deletion mutant |
| SJ135 | pET28-Oct4 C-terminus deletion mutant |

**Supplementary Table 3: Table with quantification of data**

**Figure 3b**

|                          | normalized to input nucl | binding to OBS2/3         |
|--------------------------|--------------------------|---------------------------|
| <b>Lin28B</b>            |                          |                           |
| input nucleosome (black) | 1                        |                           |
| nucl. with 1 Oct4 (red)  | 0.32                     | ratio [2 Oct4/1 Oct4]     |
| nucl. with 2 Oct4 (blue) | 0.11                     | 0.34                      |
| <b>Lin28B_1M</b>         |                          |                           |
| input nucleosome (black) | 1                        | ratio [1 Oct4/nucleosome] |
| nucl. with 1 Oct4 (red)  | 0.07                     | 0.07                      |

**Figure ED 7g**

|                          | normalized to input nucl | binding to OBS2/3          |
|--------------------------|--------------------------|----------------------------|
| input nucleosome (black) | 1                        | ratio [Sox2/nucleosome]    |
| Sox2 (grey)              | 0.13                     | 0.13                       |
| 1_Oct4 (red)             | 0.23                     | ratio [1 Oct4_Sox2/1_Oct4] |
| 1_Oct4_Sox2 (orange)     | 0.11                     | 0.48                       |
