# Supplementary material for: Histone modifications regulate pioneer transcription factor cooperativity
Source: PubMed Central journal article supplement (PMC10338341; doi:10.1038/s41586-023-06112-6), 2023-05-24
Supplement: 41586_2023_6112_MOESM2_ESM.pdf [file 41586_2023_6112_MOESM2_ESM.pdf]

## Reporting Summary

Nature Portfolio wishes to improve the reproducibility of the work that we publish. This form provides structure for consistency and transparency in reporting. For further information on Nature Portfolio policies, see our [Editorial Policies](#) and the [Editorial Policy Checklist](#).

### Statistics

For all statistical analyses, confirm that the following items are present in the figure legend, table legend, main text, or Methods section.

- | n/a                                 | Confirmed                                                                                                                                                                                                                                                                                      |
|-------------------------------------|------------------------------------------------------------------------------------------------------------------------------------------------------------------------------------------------------------------------------------------------------------------------------------------------|
| <input type="checkbox"/>            | <input checked="" type="checkbox"/> The exact sample size ( $n$ ) for each experimental group/condition, given as a discrete number and unit of measurement                                                                                                                                    |
| <input checked="" type="checkbox"/> | <input type="checkbox"/> A statement on whether measurements were taken from distinct samples or whether the same sample was measured repeatedly                                                                                                                                               |
| <input type="checkbox"/>            | <input checked="" type="checkbox"/> The statistical test(s) used AND whether they are one- or two-sided<br><i>Only common tests should be described solely by name; describe more complex techniques in the Methods section.</i>                                                               |
| <input checked="" type="checkbox"/> | <input type="checkbox"/> A description of all covariates tested                                                                                                                                                                                                                                |
| <input checked="" type="checkbox"/> | <input type="checkbox"/> A description of any assumptions or corrections, such as tests of normality and adjustment for multiple comparisons                                                                                                                                                   |
| <input type="checkbox"/>            | <input checked="" type="checkbox"/> A full description of the statistical parameters including central tendency (e.g. means) or other basic estimates (e.g. regression coefficient) AND variation (e.g. standard deviation) or associated estimates of uncertainty (e.g. confidence intervals) |
| <input type="checkbox"/>            | <input checked="" type="checkbox"/> For null hypothesis testing, the test statistic (e.g. $F$ , $t$ , $r$ ) with confidence intervals, effect sizes, degrees of freedom and $P$ value noted<br><i>Give <math>P</math> values as exact values whenever suitable.</i>                            |
| <input checked="" type="checkbox"/> | <input type="checkbox"/> For Bayesian analysis, information on the choice of priors and Markov chain Monte Carlo settings                                                                                                                                                                      |
| <input checked="" type="checkbox"/> | <input type="checkbox"/> For hierarchical and complex designs, identification of the appropriate level for tests and full reporting of outcomes                                                                                                                                                |
| <input checked="" type="checkbox"/> | <input type="checkbox"/> Estimates of effect sizes (e.g. Cohen's $d$ , Pearson's $r$ ), indicating how they were calculated                                                                                                                                                                    |

*Our web collection on [statistics for biologists](#) contains articles on many of the points above.*

### Software and code

Policy information about [availability of computer code](#)

Data collection

Data analysis

For manuscripts utilizing custom algorithms or software that are central to the research but not yet described in published literature, software must be made available to editors and reviewers. We strongly encourage code deposition in a community repository (e.g. GitHub). See the Nature Portfolio [guidelines for submitting code & software](#) for further information.

### Data

Policy information about [availability of data](#)

All manuscripts must include a [data availability statement](#). This statement should provide the following information, where applicable:

- Accession codes, unique identifiers, or web links for publicly available datasets
- A description of any restrictions on data availability
- For clinical datasets or third party data, please ensure that the statement adheres to our [policy](#)

EM densities and models have been deposited in the Electron Microscopy Data Bank and PDB under accession codes P DB 8G8G for Oct4 bound to Lin28B nucleosome built using maps EMD-29855 (Oct4 \_Nucleosome, all particles), EMD-29850 (Oct4 \_Nucleosome, H3 tail subset), E M D-29852 (Oct4 \_Nucleosome, H2A tail subset), EMD-29853 (Oct4 \_Nucleosome, H4 tail A subset), EMD-29854 (Oct4 \_Nucleosome, H4 tail B subset), EMD-29846 (Oct4 \_Nucleosome, Oct4 focus) and

PDB 8G8E. For Oct4 bound to n Matnl nucleosome following maps and coordinates were deposited: EMD-29837 and PDB 8G86 (Oct4 \_Nucleosome, nucleosome focus); EMD-29841 and PDB 8G87 (Oct4 \_Nucleosome, Oct4 focus); EMD-29843 and PDB 8G88 (Oct4 \_Nucleosome, conformation 1); EMD-29845 and PDB 8G8B (Oct4 \_Nucleosome, conformation 2).

## Human research participants

Policy information about [studies involving human research participants and Sex and Gender in Research](#).

|                             |                                 |
|-----------------------------|---------------------------------|
| Reporting on sex and gender | <input type="text" value="NA"/> |
| Population characteristics  | <input type="text" value="NA"/> |
| Recruitment                 | <input type="text" value="NA"/> |
| Ethics oversight            | <input type="text" value="NA"/> |

Note that full information on the approval of the study protocol must also be provided in the manuscript.

## Field-specific reporting

Please select the one below that is the best fit for your research. If you are not sure, read the appropriate sections before making your selection.

Life sciences     Behavioural & social sciences     Ecological, evolutionary & environmental sciences

For a reference copy of the document with all sections, see [nature.com/documents/nr-reporting-summary-flat.pdf](https://www.nature.com/documents/nr-reporting-summary-flat.pdf)

## Life sciences study design

All studies must disclose on these points even when the disclosure is negative.

|                 |                                                                                                                                                                                                                                                                                                                                            |
|-----------------|--------------------------------------------------------------------------------------------------------------------------------------------------------------------------------------------------------------------------------------------------------------------------------------------------------------------------------------------|
| Sample size     | This has been described in the corresponding figure legends. No sample size calculation was performed. For the biochemical experiments, we have performed independent experiments, which is sufficient to establish the variation.                                                                                                         |
| Data exclusions | In the EM analysis, only junk particles have been removed using 2D and 3D classifications in RELION. No other data exclusions involved in analysis.                                                                                                                                                                                        |
| Replication     | Biochemical assays have been replicated and the number of replicates has been mentioned in the figure legends. for each experiment. The cryo-EM structure determination generally does not involve repeat of the experiments, specially because of the final structure is the result of ensemble averaging of several thousand particles.  |
| Randomization   | Because there was no sub-group analysis involved and the sample size was small, no randomization was done.                                                                                                                                                                                                                                 |
| Blinding        | Blinding was not applicable to this study. Biochemical experiments were visualized using fluorescence and quantification of the bands was done using software (Quantity One, Biorad), requiring no subjective analysis. Likewise, cryoEM data was imaged and processed using standard software packages requiring no subjective judgement. |

## Reporting for specific materials, systems and methods

We require information from authors about some types of materials, experimental systems and methods used in many studies. Here, indicate whether each material, system or method listed is relevant to your study. If you are not sure if a list item applies to your research, read the appropriate section before selecting a response.

### Materials & experimental systems

| n/a                      | Included in the study                                     |
|--------------------------|-----------------------------------------------------------|
| <input type="checkbox"/> | <input checked="" type="checkbox"/> Antibodies            |
| <input type="checkbox"/> | <input checked="" type="checkbox"/> Eukaryotic cell lines |
| <input type="checkbox"/> | <input type="checkbox"/> Palaeontology and archaeology    |
| <input type="checkbox"/> | <input type="checkbox"/> Animals and other organisms      |
| <input type="checkbox"/> | <input type="checkbox"/> Clinical data                    |
| <input type="checkbox"/> | <input type="checkbox"/> Dual use research of concern     |

### Methods

| n/a                      | Included in the study                           |
|--------------------------|-------------------------------------------------|
| <input type="checkbox"/> | <input type="checkbox"/> ChIP-seq               |
| <input type="checkbox"/> | <input type="checkbox"/> Flow cytometry         |
| <input type="checkbox"/> | <input type="checkbox"/> MRI-based neuroimaging |

## Antibodies

|                 |                                                                                                                                                                                                                                                                                                                                                                                                                                                                                                                                                                                                                                                                                                                                                                                                                                                                                                                                                                                                                                                                                                                                                                                                                                                                                                   |
|-----------------|---------------------------------------------------------------------------------------------------------------------------------------------------------------------------------------------------------------------------------------------------------------------------------------------------------------------------------------------------------------------------------------------------------------------------------------------------------------------------------------------------------------------------------------------------------------------------------------------------------------------------------------------------------------------------------------------------------------------------------------------------------------------------------------------------------------------------------------------------------------------------------------------------------------------------------------------------------------------------------------------------------------------------------------------------------------------------------------------------------------------------------------------------------------------------------------------------------------------------------------------------------------------------------------------------|
| Antibodies used | anti-Oct4 antibody (Abcam ab109183), HRP-conjugated anti-His antibody (Invitrogen – Thermo Fisher R931-25), anti-H3 antibody (abcam ab1791), anti-Sox2 antibody (Abcam ab 92494), HRP-conjugated anti-rabbit secondary antibody (Biorad 170-6515)                                                                                                                                                                                                                                                                                                                                                                                                                                                                                                                                                                                                                                                                                                                                                                                                                                                                                                                                                                                                                                                 |
| Validation      | <p>anti-Oct4 antibody (abcam ab109183):<br/>validation for Oct4 band in NCCIT (Human pluripotent embryonic carcinoma epithelial cell) whole cell lysate (https://www.abcam.com/oct4-antibody-epr2054-ab109183.html)</p> <p>HRP-conjugated anti-His antibody (Invitrogen – Thermo Fisher, Catalog # R931-25):<br/>https://www.thermofisher.com/antibody/product/6x-His-Tag-Antibody-clone-3D5-Monoclonal/R931-25</p> <p>anti-H3 antibody (abcam ab1791)<br/>Chromatin from <i>Xenopus laevis</i> oocytes, A431 (Human epithelial carcinoma cell line) Whole Cell Lysate, Jurkat (Human T cell lymphoblast-like cell line) Whole Cell Lysate, HEK293 (Human embryonic kidney cell line) Whole Cell Lysate (https://www.abcam.com/histone-h3-antibody-nuclear-marker-and-chip-grade-ab1791.html)</p> <p>anti-Sox2 antibody (abcam ab 92494)<br/>NCCIT (human pluripotent embryonic carcinoma cell line) whole cell lysate, MCF7 (human breast adenocarcinoma cell line) whole cell lysate, Human glioma lysate (https://www.abcam.com/sox2-antibody-epr3131-ab92494.html)</p> <p>HRP-conjugated anti-rabbit secondary antibody (Biorad, 170-6515):<br/>https://www.bio-rad.com/en-us/sku/1662408EDU-secondary-antibody-goat-anti-rabbit-antibody-conjugated-horseradish-peroxidase?ID=1662408EDU</p> |

## Eukaryotic cell lines

Policy information about [cell lines and Sex and Gender in Research](#)

|                                                                      |                                                                                  |
|----------------------------------------------------------------------|----------------------------------------------------------------------------------|
| Cell line source(s)                                                  | Flp-In™ T-REx™ 293 Cell Line (Catalogue # R78007) from Thermo Fischer Scientific |
| Authentication                                                       | Authenticated by STR profiling at St Jude Children's Research Hospital           |
| Mycoplasma contamination                                             | Tested negative for Mycoplasma contamination.                                    |
| Commonly misidentified lines<br>(See <a href="#">ICLAC</a> register) | None                                                                             |

## Palaeontology and Archaeology

|                                                                                                                                                 |    |
|-------------------------------------------------------------------------------------------------------------------------------------------------|----|
| Specimen provenance                                                                                                                             | NA |
| Specimen deposition                                                                                                                             | NA |
| Dating methods                                                                                                                                  | NA |
| <input type="checkbox"/> Tick this box to confirm that the raw and calibrated dates are available in the paper or in Supplementary Information. |    |
| Ethics oversight                                                                                                                                | NA |

Note that full information on the approval of the study protocol must also be provided in the manuscript.

## Animals and other research organisms

Policy information about [studies involving animals; ARRIVE guidelines](#) recommended for reporting animal research, and [Sex and Gender in Research](#)

|                         |    |
|-------------------------|----|
| Laboratory animals      | NA |
| Wild animals            | NA |
| Reporting on sex        | NA |
| Field-collected samples | NA |
| Ethics oversight        | NA |

Note that full information on the approval of the study protocol must also be provided in the manuscript.

## Clinical data

Policy information about [clinical studies](#)

All manuscripts should comply with the ICMJE [guidelines for publication of clinical research](#) and a completed [CONSORT checklist](#) must be included with all submissions.

|                             |                                 |
|-----------------------------|---------------------------------|
| Clinical trial registration | <input type="text" value="NA"/> |
| Study protocol              | <input type="text" value="NA"/> |
| Data collection             | <input type="text" value="NA"/> |
| Outcomes                    | <input type="text" value="NA"/> |

## Dual use research of concern

Policy information about [dual use research of concern](#)

### Hazards

Could the accidental, deliberate or reckless misuse of agents or technologies generated in the work, or the application of information presented in the manuscript, pose a threat to:

| No                                  | Yes                                                 |
|-------------------------------------|-----------------------------------------------------|
| <input checked="" type="checkbox"/> | <input type="checkbox"/> Public health              |
| <input checked="" type="checkbox"/> | <input type="checkbox"/> National security          |
| <input checked="" type="checkbox"/> | <input type="checkbox"/> Crops and/or livestock     |
| <input checked="" type="checkbox"/> | <input type="checkbox"/> Ecosystems                 |
| <input checked="" type="checkbox"/> | <input type="checkbox"/> Any other significant area |

### Experiments of concern

Does the work involve any of these experiments of concern:

| No                                  | Yes                                                                                                  |
|-------------------------------------|------------------------------------------------------------------------------------------------------|
| <input checked="" type="checkbox"/> | <input type="checkbox"/> Demonstrate how to render a vaccine ineffective                             |
| <input checked="" type="checkbox"/> | <input type="checkbox"/> Confer resistance to therapeutically useful antibiotics or antiviral agents |
| <input checked="" type="checkbox"/> | <input type="checkbox"/> Enhance the virulence of a pathogen or render a nonpathogen virulent        |
| <input checked="" type="checkbox"/> | <input type="checkbox"/> Increase transmissibility of a pathogen                                     |
| <input checked="" type="checkbox"/> | <input type="checkbox"/> Alter the host range of a pathogen                                          |
| <input checked="" type="checkbox"/> | <input type="checkbox"/> Enable evasion of diagnostic/detection modalities                           |
| <input checked="" type="checkbox"/> | <input type="checkbox"/> Enable the weaponization of a biological agent or toxin                     |
| <input checked="" type="checkbox"/> | <input type="checkbox"/> Any other potentially harmful combination of experiments and agents         |

## ChIP-seq

### Data deposition

- Confirm that both raw and final processed data have been deposited in a public database such as [GEO](#).
- Confirm that you have deposited or provided access to graph files (e.g. BED files) for the called peaks.

|                                                                    |                                 |
|--------------------------------------------------------------------|---------------------------------|
| Data access links<br><i>May remain private before publication.</i> | <input type="text" value="NA"/> |
| Files in database submission                                       | <input type="text" value="NA"/> |
| Genome browser session<br>(e.g. <a href="#">UCSC</a> )             | <input type="text" value="NA"/> |

### Methodology

|            |                                 |
|------------|---------------------------------|
| Replicates | <input type="text" value="NA"/> |
|------------|---------------------------------|

|                         |    |
|-------------------------|----|
| Sequencing depth        | NA |
| Antibodies              | NA |
| Peak calling parameters | NA |
| Data quality            | NA |
| Software                | NA |

## Flow Cytometry

### Plots

Confirm that:

- The axis labels state the marker and fluorochrome used (e.g. CD4-FITC).
- The axis scales are clearly visible. Include numbers along axes only for bottom left plot of group (a 'group' is an analysis of identical markers).
- All plots are contour plots with outliers or pseudocolor plots.
- A numerical value for number of cells or percentage (with statistics) is provided.

### Methodology

|                           |    |
|---------------------------|----|
| Sample preparation        | NA |
| Instrument                | NA |
| Software                  | NA |
| Cell population abundance | NA |
| Gating strategy           | NA |

Tick this box to confirm that a figure exemplifying the gating strategy is provided in the Supplementary Information.

## Magnetic resonance imaging

### Experimental design

|                                 |    |
|---------------------------------|----|
| Design type                     | NA |
| Design specifications           | NA |
| Behavioral performance measures | NA |

### Acquisition

|                               |                                                                            |
|-------------------------------|----------------------------------------------------------------------------|
| Imaging type(s)               | NA                                                                         |
| Field strength                | NA                                                                         |
| Sequence & imaging parameters | NA                                                                         |
| Area of acquisition           | NA                                                                         |
| Diffusion MRI                 | <input type="checkbox"/> Used <input checked="" type="checkbox"/> Not used |

### Preprocessing

|                            |    |
|----------------------------|----|
| Preprocessing software     | NA |
| Normalization              | NA |
| Normalization template     | NA |
| Noise and artifact removal | NA |

Volume censoring

### Statistical modeling & inference

Model type and settings

Effect(s) tested

Specify type of analysis:  Whole brain  ROI-based  Both

Statistic type for inference  
(See [Eklund et al. 2016](#))

Correction

### Models & analysis

n/a | Involved in the study

Functional and/or effective connectivity

Graph analysis

Multivariate modeling or predictive analysis
